# Supplementary material
Source: Springer Nature journal article supplement (https://www.springermedizin.de/resource/supplementary/12889_2013_5961_MOESM3_ESM.pdf/9493988)
Supplement: MOESM3 [file 9493988]

Invited to participate

N = 493

Consented to participate and  
completed online survey

N = 87

Failed to respond to  
invitation

N = 406

Baseline data collection

One month

Randomisation

Dropped out

N = 1

Control group

N = 43 (19 students)

Intervention group

N = 43 (24 students)

Financial feedback  
intervention

Follow-up data collection

One month

N = 86
